# Supplementary material for: SwissPedData: Standardising hospital records for the benefit of paediatric research
Source: bioRxiv or medRxiv preprint supplement (doi:10.1101/2021.06.16.21258848), 2021-06-21
Supplement: Supplementary file [file media-1.pdf]

## Appendix 1: Paediatric registries and cohort studies in Switzerland

| Registry / Cohort Study                                                                    | Coverage |
|--------------------------------------------------------------------------------------------|----------|
| Childhood Cancer Registry ChCR                                                             | National |
| Swiss Primary Ciliary Dyskinesia Registry (SPCDR)                                          | National |
| Swiss Cerebral Palsy Registry (Swiss-CP-Reg)                                               | National |
| Swiss Growth Registry (SGR)                                                                | National |
| Swiss Paediatric Airway Cohort (SPAC)                                                      | National |
| Swiss Paediatric Renal Registry (SPRR)                                                     | National |
| Swiss Rare Disease Registry (SRDR)                                                         | National |
| Swiss Registry for Neuro-Muscular Disorders (Swiss-Reg-NMD)                                | National |
| Cystic Fibrosis (CF) newborn screening                                                     | National |
| Juvenile Inflammatory Rheumatism cohort (JIRcohorte)                                       | European |
| SwissNeoNet Minimal Neonatal Data Set (MNDS)                                               | National |
| SwissNeoNet National Asphyxia and Cooling Registry (ASP)                                   | National |
| SwissNeoNet Follow-Up (FU)                                                                 | National |
| Swiss NeuroPaediatric Stroke Registry (SNPSR)                                              | National |
| Swiss Congenital Lung Anomalies (CLA) Registry                                             | National |
| Swiss Mother and Child HIV Cohort Study (MoCHiV)                                           | National |
| Swiss Cystic Fibrosis Infant Lung Development (SCILD) cohort                               | National |
| Swiss Pediatric Surveillance Unit (SPSU)                                                   | National |
| Swiss Hemophilia Registry (SHN)                                                            | National |
| COST Action BM1105 Patient Registry - GnRH Network                                         | European |
| Registry of congenital anomalies in the canton of Vaud                                     | National |
| Swiss Cleft lip and Palate Registry                                                        | National |
| Swiss Biliary Atresia Registry                                                             | National |
| Swiss registry on Autoimmune Hepatitis                                                     | National |
| European Registry for Primary Immunodeficiencies (ESID registry)                           | European |
| European Cystic Fibrosis Patient Registry (ECFSPR)                                         | European |
| European Childhood Interstitial Lung Disease (chILD-EU) Registry                           | European |
| Swiss Inflammatory Bowel Disease Pediatric Cohort Study (Swiss IBD Pediatric Cohort Study) | National |
| Splenectomy Registry                                                                       | Global   |
| Pediatric and Adult Intercontinental Registry on Chronic ITP (PARC-ITP registry)           | Global   |
| Diabetes Patienten Verlaufsdokumentation Registry (DPV)                                    | European |
