# Supplementary material for: SwissPedData: Standardising hospital records for the benefit of paediatric research
Source: bioRxiv or medRxiv preprint supplement (doi:10.1101/2021.06.16.21258848), 2021-06-21
Supplement: Supplementary file [file media-2.pdf]

**Appendix 2: Number of experts involved at each stage of the Delphi process**

| Paediatric specialty | Number of experts invited | Delphi process, number of experts involved |           |           |           |
|----------------------|---------------------------|--------------------------------------------|-----------|-----------|-----------|
|                      |                           | 1st round                                  | 2nd round | 3rd round | 4th round |
| General paediatrics  | 14                        | 8                                          | 4         | 4         | 5         |
| Cardiology           | 13                        | 10                                         | 4         | 7         | 8         |
| Endocrinology        | 12                        | 7                                          | 6         | 8         | 9         |
| Gastroenterology     | 10                        | 8                                          | 4         | 4         | 6         |
| Allergy/Immunology   | 12                        | 6                                          | 4         | 8         | 7         |
| Infectiology         | 11                        | 8                                          | 5         | 6         | 9         |
| Metabolic diseases   | 8                         | 7                                          | 2         | 4         | 3         |
| Nephrology           | 12                        | 3                                          | 4         | 5         | 4         |
| Neurology            | 14                        | 5                                          | 4         | 3         | 5         |
| Pulmonology          | 11                        | 8                                          | 5         | 4         | 6         |
| Rheumatology         | 8                         | 3                                          | 3         | 5         | 6         |
