# Supplementary material for: SwissPedData: Standardising hospital records for the benefit of paediatric research
Source: bioRxiv or medRxiv preprint supplement (doi:10.1101/2021.06.16.21258848), 2021-06-21
Supplement: Supplementary file [file media-3.pdf]

### Appendix 3 : SwissPedData Common Data Model (CDM), Version 1.0

| Module(s)                   | Common Data Element                             | Format               | Standardized response options                                                   | Importance  | Comment / Description                                                                           |
|-----------------------------|-------------------------------------------------|----------------------|---------------------------------------------------------------------------------|-------------|-------------------------------------------------------------------------------------------------|
| <b>Domain: Care site</b>    |                                                 |                      |                                                                                 |             |                                                                                                 |
| General paediatrics         | <b>Type of admission</b>                        | standardized options | Elective admission<br>Emergency admission                                       | Mandatory   |                                                                                                 |
| General paediatrics         | <b>Provenance</b>                               | standardized options | Other hospital<br>Emergency department<br>Home<br>Other                         | Mandatory   |                                                                                                 |
| General paediatrics         | <b>Care Handling Type</b>                       | standardized options | Inpatient<br>Outpatient                                                         | Mandatory   |                                                                                                 |
| General paediatrics         | <b>Visit start date and time</b>                | datetime             | YYYY-MM-DD hh:mm:ss                                                             | Mandatory   | Datetime at which the interaction between individual and the care provider institute started    |
| General paediatrics         | <b>Visit end date and time</b>                  | datetime             | YYYY-MM-DD hh:mm:ss                                                             | Mandatory   | Datetime at which the interaction between individual and the care provider institute stopped    |
| General paediatrics         | <b>Datetime of admission</b>                    | datetime             | YYYY-MM-DD hh:mm:ss                                                             | Mandatory   | Datetime of patient's admission to the care provider institute                                  |
| General paediatrics         | <b>Discharge destination</b>                    | standardized options | Home<br>Other hospital<br>Institution<br>Other                                  | Mandatory   | Location to which the patient is discharged                                                     |
| General paediatrics         | <b>Follow-up after discharge / consultation</b> | standardized options | General paediatrician<br>General practitioner<br>Subspecialist<br>Nurse<br>None | Mandatory   | Scheduled follow-up at discharge                                                                |
| General paediatrics         | <b>Translator needed</b>                        | standardized options | Yes<br>No<br>Unknown                                                            | Recommended | Translator needed for communication between patient and healthcare team                         |
| General paediatrics         | <b>Hospital</b>                                 | standardized options | See comments                                                                    | Mandatory   | Standardized response options will be name of participating children's hospitals                |
| General paediatrics         | <b>Department</b>                               | standardized options | See comments                                                                    | Mandatory   | Standardized response options will be name of departments of participating children's hospitals |
| General paediatrics         | <b>Unit</b>                                     | standardized options | See comments                                                                    | Mandatory   | Standardized response options will be name of units of participating children's hospitals       |
| Infectious diseases         | <b>If coming from another hospital: Country</b> | standardized options | Swiss Federal Statistical Office: ISO code of the country of origin             | Mandatory   | Country of originating hospital                                                                 |
| <b>Domain: Demographics</b> |                                                 |                      |                                                                                 |             |                                                                                                 |
| General paediatrics         | <b>Patient Datetime of birth</b>                | datetime             | YYYY-MM-DD hh:mm:ss                                                             | Mandatory   | Datetime of birth of the patient                                                                |
| General paediatrics         | <b>Country of birth</b>                         | standardized options | Swiss Federal Statistical Office: ISO code of the country of origin             | Mandatory   | Country of birth of the patient                                                                 |
| General paediatrics         | <b>Place of birth (CH)</b>                      | number               | Postal code (PLZ/NPA)                                                           | Mandatory   | Municipality of birth of the patient if in Switzerland, coded by postal codes (PLZ/NPA).        |

### Appendix 3 : SwissPedData Common Data Model (CDM), Version 1.0

| Module(s)                      | Common Data Element                                     | Format               | Standardized response options                                                                                                                | Importance              | Comment / Description                                                                                  |
|--------------------------------|---------------------------------------------------------|----------------------|----------------------------------------------------------------------------------------------------------------------------------------------|-------------------------|--------------------------------------------------------------------------------------------------------|
| General paediatrics            | <b>Patient administrative gender</b>                    | standardized options | Male<br>Female<br>Other                                                                                                                      | Mandatory               |                                                                                                        |
| General paediatrics            | <b>Address (postal code)</b>                            | number               | Postal code (PLZ/NPA)                                                                                                                        | Mandatory               | Current address of the patient, coded by postal codes (PLZ/NPA). Exact address should also be recorded |
| General paediatrics            | <b>Nationality</b>                                      | standardized options | Swiss Federal Statistical Office: ISO code of the country of origin                                                                          | Mandatory               | Current nationality of the patient                                                                     |
| General paediatrics            | <b>Date of immigration</b>                              | date                 | YYYY-MM-DD                                                                                                                                   | Mandatory               | Date of first immigration to Switzerland if born abroad                                                |
| Infectious diseases            | <b>If immigrant: Type of residency permit</b>           | standardized options | B<br>C<br>G<br>L<br>F<br>N<br>S<br>undocumented                                                                                              | Optional                |                                                                                                        |
| Metabolic diseases             | <b>Ethnicity of the mother</b>                          | standardized options | See comments                                                                                                                                 | Optional                | Standard classification to be defined                                                                  |
| Metabolic diseases             | <b>Ethnicity of the father</b>                          | standardized options | See comments                                                                                                                                 | Optional                | Standard classification to be defined                                                                  |
| Rheumatology<br>Pulmonology    | <b>Ethnicity of the patient</b>                         | standardized options | See comments                                                                                                                                 | Optional<br>Recommended | Standard classification to be defined. Optional for rheumatology, recommended for pulmonology.         |
| <b>Domain: Medical history</b> |                                                         |                      |                                                                                                                                              |                         |                                                                                                        |
| General paediatrics            | <b>Reason for consultation / for admission</b>          | free text            |                                                                                                                                              | Mandatory               | Main reason for consultation or for admission. Standard classification not defined.                    |
| General paediatrics            | <b>Current medications: Drug name</b>                   | standardized options | International non-proprietary name                                                                                                           | Mandatory               | Name of the drug(s) received as inpatient                                                              |
| General paediatrics            | <b>Current medications: Route of administration</b>     | standardized options | Oral<br>Intravenous<br>Subcutaneous<br>Intramuscular<br>Intrathecal<br>Rectal<br>Inhalation<br>Cutaneous<br>Ocular<br>Nasal<br>Otic<br>Other | Mandatory               |                                                                                                        |
| General paediatrics            | <b>Current medications: Frequency of administration</b> | number               |                                                                                                                                              | Mandatory               | Number of administrations per 24 hours                                                                 |
| General paediatrics            | <b>Current medications: Dose</b>                        | number               |                                                                                                                                              | Mandatory               | Dose given at each administration of the drug                                                          |

### Appendix 3 : SwissPedData Common Data Model (CDM), Version 1.0

| Module(s)                   | Common Data Element                   | Format               | Standardized response options                                                      | Importance  | Comment / Description                                                                                    |
|-----------------------------|---------------------------------------|----------------------|------------------------------------------------------------------------------------|-------------|----------------------------------------------------------------------------------------------------------|
| General paediatrics         | <b>Current medications: Dose unit</b> | standardized options |                                                                                    | Mandatory   | List of possible units to be defined                                                                     |
| General paediatrics         | <b>Use of complementary medicine</b>  | yes/no               |                                                                                    | Optional    | Patient treated with complementary medicine at home or in hospital                                       |
| General paediatrics         | <b>Birth weight</b>                   | number               |                                                                                    | Mandatory   | Weight at birth in kg                                                                                    |
| General paediatrics         | <b>Birth length</b>                   | number               |                                                                                    | Mandatory   | Length at birth in cm                                                                                    |
| General paediatrics         | <b>Birth's head circumference</b>     | number               |                                                                                    | Mandatory   | Head circumference at birth in cm                                                                        |
| General paediatrics         | <b>Delivery mode</b>                  | standardized options | Caesarean section<br>Instrumental vaginal delivery<br>Spontaneous vaginal delivery | Mandatory   | Birth delivery mode                                                                                      |
| General paediatrics         | <b>Gestational age</b>                | number               |                                                                                    | Mandatory   | Post-menstrual age at birth in week and days                                                             |
| General paediatrics         | <b>Apgar score 1 min</b>              | number               |                                                                                    | Recommended | Apgar score 1 min after birth                                                                            |
| General paediatrics         | <b>Apgar score 5 min</b>              | number               |                                                                                    | Recommended | Apgar score 5 min after birth                                                                            |
| General paediatrics         | <b>Apgar score 10 min</b>             | number               |                                                                                    | Recommended | Apgar score 10 min after birth                                                                           |
| General paediatrics         | <b>Mother's year of birth</b>         | number               |                                                                                    | Mandatory   | Year of birth of the mother                                                                              |
| General paediatrics         | <b>Father's year of birth</b>         | number               |                                                                                    | Mandatory   | Year of birth of the father                                                                              |
| General paediatrics         | <b>Year(s) of birth of sibling(s)</b> | number               |                                                                                    | Mandatory   | Year of birth of sibling(s) if any                                                                       |
| General paediatrics         | <b>Drug allergies</b>                 | standardized options | International Nonproprietary Name of drug                                          | Mandatory   | Known drug allergies                                                                                     |
| General paediatrics         | <b>Documented food allergies</b>      | yes/no               |                                                                                    | Mandatory   | Presence of any documented food allergy                                                                  |
| Endocrinology               | <b>Age at menarche</b>                | number               |                                                                                    | Mandatory   | Age at menarche in years                                                                                 |
| Endocrinology               | <b>Age at thelarche</b>               | number               |                                                                                    | Mandatory   | Age at thelarche in years                                                                                |
| Endocrinology               | <b>Age at pubarche</b>                | number               |                                                                                    | Mandatory   | Age at pubarche in years                                                                                 |
| Endocrinology               | <b>Single/Multiple birth</b>          | number               |                                                                                    | Recommended | Number of children born from the same pregnancy as the patient's                                         |
| Endocrinology               | <b>Neonatal hypoglycaemia</b>         | standardized options | No<br>Yes, confirmed<br>Yes, reported by patient/family                            | Recommended | History of hypoglycaemia in the neonatal period                                                          |
| Endocrinology               | <b>Neonatal hyperbilirubinemia</b>    | standardized options | No<br>Yes, confirmed<br>Yes, reported by patient/family                            | Recommended | History of hyperbilirubinemia in the neonatal period (only hyperbilirubinemia treated with phototherapy) |
| Endocrinology<br>Nephrology | <b>Mother's height</b>                | number               |                                                                                    | Mandatory   | Height of the mother in cm                                                                               |
| Endocrinology<br>Nephrology | <b>Father's height</b>                | number               |                                                                                    | Mandatory   | Height of the father in cm                                                                               |
| Endocrinology               | <b>Mother's age at menarche</b>       | number               |                                                                                    | Mandatory   | Age of the mother at menarche in years                                                                   |

### Appendix 3 : SwissPedData Common Data Model (CDM), Version 1.0

| Module(s)                              | Common Data Element                                         | Format               | Standardized response options                                       | Importance  | Comment / Description                                                                                             |
|----------------------------------------|-------------------------------------------------------------|----------------------|---------------------------------------------------------------------|-------------|-------------------------------------------------------------------------------------------------------------------|
| Endocrinology                          | <b>Father's puberty</b>                                     | standardized options | Normal<br>Early<br>Late                                             | Mandatory   |                                                                                                                   |
| Endocrinology                          | <b>Diabetes in first degree relatives</b>                   | standardized options | No<br>Yes, Type 1<br>Yes, Type 2<br>Yes, Monogenic<br>Unknown       | Mandatory   | Any type of diabetes in a first degree relative                                                                   |
| Endocrinology                          | <b>Thyroid disorder in first degree relative</b>            | yes/no               |                                                                     | Mandatory   | Presence of thyroid disorder in a first degree relative                                                           |
| Endocrinology                          | <b>Other auto-immune disorders in first degree relative</b> | yes/no               |                                                                     | Recommended | Presence of auto-immune disorder in a first degree relative. With added box for free text to specify the disease. |
| Endocrinology                          | <b>Other endocrinopathy in first degree relative</b>        | yes/no               |                                                                     | Mandatory   | Presence of endocrinopathy in a first degree relative. With added box for free text to specify the disease.       |
| Endocrinology                          | <b>Fertility problems in first degree relative</b>          | yes/no               |                                                                     | Recommended | Presence of fertility problems in first degree relatives. With added box for free text to specify the disease.    |
| Endocrinology                          | <b>Severe hypoglycaemia (requiring assistance OR coma)</b>  | number               |                                                                     | Mandatory   | Number of events since last visit                                                                                 |
| Endocrinology                          | <b>Mild hypoglycaemia (BG &lt; 3.9mmol/l)</b>               | number               |                                                                     | Mandatory   | Number of events per month                                                                                        |
| Endocrinology                          | <b>Ketoacidosis</b>                                         | standardized options | No<br>Yes, managed ambulatorily<br>Yes, with hospitalization        | Mandatory   | History of ketoacidosis                                                                                           |
| Endocrinology                          | <b>Diagnostic of obesity in first degree relative</b>       | yes/no               |                                                                     | Recommended | Diagnostic of obesity in a first degree relative                                                                  |
| Gastroenterology                       | <b>Nutrition habits</b>                                     | standardized options | No specific diet<br>Vegetarian<br>Vegan<br>Other                    | Recommended | Nutrition habits of the patient                                                                                   |
| Gastroenterology<br>Metabolic diseases | <b>Route of feeding</b>                                     | standardized options | Oral<br>Gastrostomy<br>Naso/orogastric tube<br>Intravenous<br>Other | Mandatory   | The route(s) by which the patient is fed                                                                          |
| Allergy/Immunology                     | <b>History of rhinoconjunctivitis</b>                       | standardized options | Yes, reported<br>Yes, documented<br>No                              | Mandatory   |                                                                                                                   |
| Allergy/Immunology                     | <b>History of atopic dermatitis</b>                         | standardized options | Yes, reported<br>Yes, documented<br>No                              | Mandatory   |                                                                                                                   |
| Allergy/Immunology                     | <b>History of wheezing</b>                                  | standardized options | Yes, reported<br>Yes, documented<br>No                              | Mandatory   |                                                                                                                   |

### Appendix 3 : SwissPedData Common Data Model (CDM), Version 1.0

| Module(s)                              | Common Data Element                                             | Format               | Standardized response options          | Importance  | Comment / Description                                                                                               |
|----------------------------------------|-----------------------------------------------------------------|----------------------|----------------------------------------|-------------|---------------------------------------------------------------------------------------------------------------------|
| Allergy/Immunology                     | <b>History of asthma</b>                                        | standardized options | Yes, reported<br>Yes, documented<br>No | Mandatory   |                                                                                                                     |
| Allergy/Immunology                     | <b>Respiratory support during first hours of life</b>           | standardized options | Yes, reported<br>Yes, documented<br>No | Recommended | Presence of any kind of respiratory support (non-invasive and invasive ventilation) during first hours of life      |
| Allergy/Immunology                     | <b>Supplemental O2 during first hours of life</b>               | standardized options | Yes, reported<br>Yes, documented<br>No | Recommended | Supplemental oxygen administered during first hours of life                                                         |
| Allergy/Immunology                     | <b>Chronic diarrhea</b>                                         | yes/no               |                                        | Mandatory   |                                                                                                                     |
| Allergy/Immunology                     | <b>Number of hospitalisations for IV antibiotherapy in life</b> | number               |                                        | Mandatory   |                                                                                                                     |
| Allergy/Immunology                     | <b>Maximal number of otitis media in one year</b>               | number               |                                        | Mandatory   |                                                                                                                     |
| Allergy/Immunology                     | <b>Number of pneumonias in life</b>                             | number               |                                        | Mandatory   |                                                                                                                     |
| Allergy/Immunology                     | <b>Number of sinusitis in life</b>                              | number               |                                        | Mandatory   |                                                                                                                     |
| Allergy/Immunology                     | <b>Number of meningitis in life</b>                             | number               |                                        | Mandatory   |                                                                                                                     |
| Allergy/Immunology                     | <b>Family history of atopic diseases</b>                        | yes/no               |                                        | Mandatory   | Presence of atopic diseases in a first degree relative                                                              |
| Allergy/Immunology                     | <b>Family history of immunodeficiency</b>                       | yes/no               |                                        | Mandatory   | Presence of immunodeficiency in a first degree relative                                                             |
| Allergy/Immunology                     | <b>Family history of auto-immune disease</b>                    | yes/no               |                                        | Mandatory   | Presence of auto-immune disease in a first degree relative                                                          |
| Allergy/Immunology                     | <b>Family history of angioedema</b>                             | yes/no               |                                        | Mandatory   | Presence of angioedema in a first degree relative                                                                   |
| Allergy/Immunology<br>Gastroenterology | <b>Documented food allergy by oral food challenge</b>           | yes/no               |                                        | Mandatory   | Presence of any documented food allergy (diagnosed by physician)                                                    |
| Allergy/Immunology                     | <b>Hymenoptera venom allergies</b>                              | standardized options | Yes, reported<br>Yes, documented<br>No | Mandatory   | Known documented hymenoptera allergies                                                                              |
| Allergy/Immunology                     | <b>History of anaphylaxis</b>                                   | standardized options | Yes, reported<br>Yes, documented<br>No | Mandatory   | History of anaphylaxis                                                                                              |
| Allergy/Immunology                     | <b>Autoimmune or inflammatory diseases in the patient</b>       | yes/no               |                                        | Mandatory   | Classification for type of autoimmunity (organ specific or systemic) and organ(s) involved will be further defined. |
| Infectious diseases                    | <b>History of fever (&gt;38°C)</b>                              | yes/no               |                                        | Mandatory   |                                                                                                                     |
| Infectious diseases                    | <b>If history of fever: Number of days with fever</b>           | number               |                                        | Mandatory   |                                                                                                                     |
| Infectious diseases                    | <b>History of cough</b>                                         | yes/no               |                                        | Mandatory   |                                                                                                                     |

### Appendix 3 : SwissPedData Common Data Model (CDM), Version 1.0

| Module(s)           | Common Data Element                                | Format               | Standardized response options                                                                  | Importance  | Comment / Description                                                           |
|---------------------|----------------------------------------------------|----------------------|------------------------------------------------------------------------------------------------|-------------|---------------------------------------------------------------------------------|
| Infectious diseases | <b>History of running nose</b>                     | yes/no               |                                                                                                | Mandatory   |                                                                                 |
| Infectious diseases | <b>History of diarrhea</b>                         | yes/no               |                                                                                                | Mandatory   |                                                                                 |
| Infectious diseases | <b>History of vomiting</b>                         | yes/no               |                                                                                                | Mandatory   |                                                                                 |
| Infectious diseases | <b>History of headache</b>                         | yes/no               |                                                                                                | Mandatory   |                                                                                 |
| Infectious diseases | <b>Travel history in the last 6 months</b>         | standardized options | Swiss Federal Statistical Office: ISO code of the country of origin (selection of >1 possible) | Mandatory   | Country(ies) visited in the last 6 months                                       |
| Infectious diseases | <b>History of tick bite</b>                        | yes/no               |                                                                                                | Recommended |                                                                                 |
| Infectious diseases | <b>If history of tick bite: Month of tick bite</b> | date                 | YYYY-MM                                                                                        | Recommended |                                                                                 |
| Infectious diseases | <b>History of contact with animals</b>             | yes/no               | No<br>Yes                                                                                      | Optional    | Standard animal list to be defined                                              |
| Infectious diseases | <b>Pertussis immunization during pregnancy</b>     | yes/no               |                                                                                                | Mandatory   | For patients under 6 months of age                                              |
| Infectious diseases | <b>Influenza immunization during pregnancy</b>     | yes/no               |                                                                                                | Mandatory   | For patients under 6 months of age                                              |
| Infectious diseases | <b>Prolonged rupture of membranes</b>              | yes/no               |                                                                                                | Mandatory   | For patients under 1 month of age. Prolonged rupture defined as longer than 18h |
| Infectious diseases | <b>Maternal GBS colonization</b>                   | standardized options | Positive<br>Negative<br>Unknown                                                                | Mandatory   | For patients under 1 month of age                                               |
| Infectious diseases | <b>Maternal HIV serology</b>                       | standardized options | Positive<br>Negative<br>Unknown                                                                | Mandatory   | For patients under 1 month of age                                               |
| Infectious diseases | <b>Maternal HBsAg</b>                              | standardized options | Positive<br>Negative<br>Unknown                                                                | Mandatory   | For patients under 1 month of age                                               |
| Infectious diseases | <b>Maternal HBsAb</b>                              | standardized options | Positive<br>Negative<br>Unknown                                                                | Mandatory   | For patients under 1 month of age                                               |
| Infectious diseases | <b>Maternal HBcAb</b>                              | standardized options | Positive<br>Negative<br>Unknown                                                                | Mandatory   | For patients under 1 month of age                                               |
| Infectious diseases | <b>Maternal HBeAg</b>                              | standardized options | Positive<br>Negative<br>Unknown                                                                | Mandatory   | For patients under 1 month of age                                               |
| Infectious diseases | <b>Maternal HCV serology</b>                       | standardized options | Positive<br>Negative<br>Unknown                                                                | Mandatory   | For patients under 1 month of age                                               |
| Infectious diseases | <b>Maternal CMV serology (IgG / IgM)</b>           | standardized options | Positive<br>Negative<br>Unknown                                                                | Optional    | For patients under 1 month of age                                               |

### Appendix 3 : SwissPedData Common Data Model (CDM), Version 1.0

| Module(s)           | Common Data Element                                        | Format               | Standardized response options                                                                                                                                                                                                                                                                                         | Importance  | Comment / Description                                              |
|---------------------|------------------------------------------------------------|----------------------|-----------------------------------------------------------------------------------------------------------------------------------------------------------------------------------------------------------------------------------------------------------------------------------------------------------------------|-------------|--------------------------------------------------------------------|
| Infectious diseases | <b>Maternal syphilis serology</b>                          | standardized options | Positive<br>Negative<br>Unknown                                                                                                                                                                                                                                                                                       | Mandatory   | For patients under 1 month of age                                  |
| Infectious diseases | <b>Maternal rubella serology</b>                           | standardized options | Positive<br>Negative<br>Unknown                                                                                                                                                                                                                                                                                       | Mandatory   | For patients under 1 month of age                                  |
| Infectious diseases | <b>Maternal toxoplasmosis serology</b>                     | standardized options | Positive<br>Negative<br>Unknown                                                                                                                                                                                                                                                                                       | optional    | For patients under 1 month of age                                  |
| Infectious diseases | <b>Maternal Chagas serology</b>                            | standardized options | Positive<br>Negative<br>Unknown                                                                                                                                                                                                                                                                                       | Mandatory   | For patients under 1 month of age                                  |
| Metabolic diseases  | <b>Self-monitoring of blood glucose</b>                    | yes/no               |                                                                                                                                                                                                                                                                                                                       | Optional    | Regular self-monitoring of blood glucose done at home              |
| Metabolic diseases  | <b>Self-monitoring of ketone bodies</b>                    | yes/no               |                                                                                                                                                                                                                                                                                                                       | Optional    | Regular self-monitoring of ketone bodies done at home              |
| Nephrology          | <b>Prenatal ultrasound</b>                                 | standardized option  | Normal<br>An-/Oligohydramnios<br>Polyhydramnios<br>Megacystis<br>Megaureter<br>Bilateral renal pelvis dilatation > 10 mm<br>Bilateral renal pelvis dilatation < 10 mm<br>Unilateral renal pelvis dilatation > 10 mm<br>Renal cysts<br>Renal agenesis or ectopia<br>Multicystic-dysplastic kidney and bladder extrophy | Mandatory   |                                                                    |
| Nephrology          | <b>Family history of renal disease (1st-2nd degree)</b>    | yes/no               |                                                                                                                                                                                                                                                                                                                       | Mandatory   |                                                                    |
| Neurology           | <b>Seizure type (ILEA 2017 Classification of Seizures)</b> | standardized options | Focal Onset<br>Generalized Onset<br>Unknown Onset<br>Unclassified                                                                                                                                                                                                                                                     | Recommended | Seizure type according to the ILEA 2017 classification of seizures |
| Neurology           | <b>Family history of neurological diseases</b>             | yes/no               |                                                                                                                                                                                                                                                                                                                       | Recommended | Family history of any type of neurological diseases                |
| Pulmonology         | <b>Cough</b>                                               | standardized options | No<br>Yes, acute and dry<br>Yes, acute and wet<br>Yes, chronic and dry<br>Yes, chronic and wet                                                                                                                                                                                                                        | Recommended | Cut-off for acute/chronic 4 weeks                                  |
| Rheumatology        | <b>Recurrent fever</b>                                     | yes/no               |                                                                                                                                                                                                                                                                                                                       | Mandatory   | History of recurrent fever                                         |

### Appendix 3 : SwissPedData Common Data Model (CDM), Version 1.0

| Module(s)                           | Common Data Element                                     | Format               | Standardized response options                                           | Importance  | Comment / Description                                                                                            |
|-------------------------------------|---------------------------------------------------------|----------------------|-------------------------------------------------------------------------|-------------|------------------------------------------------------------------------------------------------------------------|
| Rheumatology                        | <b>History of uveitis</b>                               | yes/no               |                                                                         | Mandatory   | Presence of active uveitis                                                                                       |
| Rheumatology                        | <b>History of inflammatory skin disease</b>             | yes/no               |                                                                         | Mandatory   | Presence of skin involvement                                                                                     |
| Rheumatology                        | <b>Family history of inflammatory rheumatic disease</b> | standardized options | No<br>Yes, without spondyloarthropathy<br>Yes, with spondyloarthropathy | Mandatory   | Presence of any rheumatic disease in the family                                                                  |
| Rheumatology                        | <b>Family history of inflammatory skin disease</b>      | standardized options | No<br>Yes, without psoriasis<br>Yes, with psoriasis                     | Mandatory   | Presence of any skin disease in the family                                                                       |
| Rheumatology                        | <b>Family history of chronic intestinal diseases</b>    | yes/no               |                                                                         | Mandatory   | Presence of any chronic intestinal disease in the family                                                         |
| Rheumatology                        | <b>Family history of recurrent fever</b>                | yes/no               |                                                                         | Mandatory   | Presence of recurrent fever in the family                                                                        |
| <b>Domain: Physical examination</b> |                                                         |                      |                                                                         |             |                                                                                                                  |
| General paediatrics                 | <b>Heart rate</b>                                       | number               |                                                                         | Mandatory   | Heart rate in beats per minute                                                                                   |
| General paediatrics                 | <b>Systolic blood pressure</b>                          | number               |                                                                         | Mandatory   | Value of the systolic blood pressure in mmHg                                                                     |
| General paediatrics                 | <b>Diastolic blood pressure</b>                         | number               |                                                                         | Mandatory   | Value of the diastolic blood pressure in mmHg                                                                    |
| General paediatrics                 | <b>Respiratory rate</b>                                 | number               |                                                                         | Mandatory   | Respiratory rate in breaths per minute                                                                           |
| General paediatrics                 | <b>Oxygen saturation</b>                                | number               |                                                                         | Mandatory   | Measured oxygen saturation in %                                                                                  |
| General paediatrics                 | <b>Temperature</b>                                      | number               |                                                                         | Mandatory   | Measured temperature of the patient in Celsius degrees                                                           |
| General paediatrics                 | <b>Weight</b>                                           | number               |                                                                         | Mandatory   | Measured weight of the patient in kg                                                                             |
| General paediatrics                 | <b>Height</b>                                           | number               |                                                                         | Mandatory   | Measured height of the patient in cm                                                                             |
| General paediatrics                 | <b>Head circumference</b>                               | number               |                                                                         | Mandatory   | Measured head circumference of the patient in cm                                                                 |
| Endocrinology                       | <b>Sitting height</b>                                   | number               |                                                                         | Recommended | Sitting height measured sitting with straight back in in cm                                                      |
| Endocrinology                       | <b>Arm span</b>                                         | number               |                                                                         | Recommended | Arm span: arms stretched horizontally, measurement from fingertip to fingertip in cm                             |
| Endocrinology                       | <b>Waist circumference</b>                              | number               |                                                                         | Recommended | In cm                                                                                                            |
| Endocrinology                       | <b>Hip circumference</b>                                | number               |                                                                         | Recommended | In cm                                                                                                            |
| Endocrinology                       | <b>Goiter</b>                                           | yes/no               |                                                                         | Recommended | Presence of goiter                                                                                               |
| Endocrinology                       | <b>Gynecomastia</b>                                     | standardized options | No<br>Yes, unilateral<br>Yes, bilateral                                 | Recommended | Presence of gynecomastia                                                                                         |
| Endocrinology<br>Metabolic diseases | <b>Dysmorphic signs</b>                                 | yes/no               |                                                                         | Recommended | Presence of dysmorphic features. If answer is yes, specification with standardized classification to be defined. |



**Appendix 3 : SwissPedData Common Data Model (CDM), Version 1.0**

| Module(s)                                                 | Common Data Element                                   | Format               | Standardized response options                                | Importance  | Comment / Description                                                                |
|-----------------------------------------------------------|-------------------------------------------------------|----------------------|--------------------------------------------------------------|-------------|--------------------------------------------------------------------------------------|
| Endocrinology                                             | <b>Cryptorchidism</b>                                 | standardized options | No<br>Yes, unilateral<br>Yes, bilateral                      | Mandatory   | Presence of cryptorchidism                                                           |
| Endocrinology                                             | <b>Insulin injection site</b>                         | standardized options | Normal<br>Abnormal, lipoatrophy<br>Abnormal, lipohypertrophy | Optional    | Inspection of insulin delivery sites                                                 |
| Endocrinology                                             | <b>Retinopathy screening</b>                          | normal/abnormal      |                                                              | Optional    |                                                                                      |
| Endocrinology                                             | <b>Neuropathy screening performed</b>                 | standardized options | No<br>Yes, vibration<br>Yes, monofilament                    | Optional    |                                                                                      |
| Endocrinology                                             | <b>Testis volume right side</b>                       | number               |                                                              | Mandatory   | Volume of right testis in ml                                                         |
| Endocrinology                                             | <b>Testis volume left side</b>                        | number               |                                                              | Mandatory   | Volume of left testis in ml                                                          |
| Endocrinology                                             | <b>Tanner breast stage</b>                            | number               |                                                              | Mandatory   |                                                                                      |
| Endocrinology                                             | <b>Tanner pubic hair stage</b>                        | number               |                                                              | Mandatory   |                                                                                      |
| Endocrinology                                             | <b>Tanner axillary hair stage</b>                     | number               |                                                              | Mandatory   |                                                                                      |
| Endocrinology                                             | <b>Tanner genital stage</b>                           | number               |                                                              | Recommended |                                                                                      |
| Endocrinology                                             | <b>Breast size</b>                                    | number               |                                                              | Optional    | In cm                                                                                |
| Endocrinology                                             | <b>Female genital examination</b>                     | normal/abnormal      |                                                              | Mandatory   |                                                                                      |
| Endocrinology                                             | <b>Penis length</b>                                   | number               |                                                              | Recommended | In cm                                                                                |
| Endocrinology                                             | <b>Chovstek sign</b>                                  | yes/no               |                                                              | Recommended | Twitching of facial muscles in response to tapping over the area of the facial nerve |
| Endocrinology                                             | <b>Trousseau sign</b>                                 | yes/no               |                                                              | Recommended | Carpopedal spasm that results from ischemia                                          |
| Endocrinology                                             | <b>Thyroid nodule</b>                                 | yes/no               |                                                              | Recommended | Presence of thyroid nodule                                                           |
| Infectious diseases<br>Metabolic diseases<br>Rheumatology | <b>Hepatomegaly noted at physical examination</b>     | yes/no               |                                                              | Mandatory   |                                                                                      |
| Infectious diseases<br>Metabolic diseases<br>Rheumatology | <b>Splenomegaly noted at physical examination</b>     | yes/no               |                                                              | Mandatory   |                                                                                      |
| Infectious diseases                                       | <b>Meningeal signs noted at physical examination</b>  | yes/no               |                                                              | Mandatory   |                                                                                      |
| Infectious diseases<br>Rheumatology                       | <b>Skin lesion noted at physical examination</b>      | yes/no               |                                                              | Mandatory   |                                                                                      |
| Infectious diseases                                       | <b>Irritability noted during physical examination</b> | yes/no               |                                                              | Mandatory   |                                                                                      |
| Infectious diseases<br>Rheumatology                       | <b>Adenopathy noted at physical examination</b>       | standardized options | No<br>Yes, localized                                         | Mandatory   |                                                                                      |

### Appendix 3 : SwissPedData Common Data Model (CDM), Version 1.0

| Module(s)           | Common Data Element                                                               | Format               | Standardized response options                                | Importance  | Comment / Description                                                                                                              |
|---------------------|-----------------------------------------------------------------------------------|----------------------|--------------------------------------------------------------|-------------|------------------------------------------------------------------------------------------------------------------------------------|
|                     |                                                                                   |                      | Yes, generalized                                             |             |                                                                                                                                    |
| Infectious diseases | <b>Respiratory distress noted at physical examination</b>                         | yes/no               |                                                              | Mandatory   |                                                                                                                                    |
| Infectious diseases | <b>Conjunctivitis noted at physical examination</b>                               | yes/no               |                                                              | Mandatory   |                                                                                                                                    |
| Infectious diseases | <b>Prolonged capillary refill time (&gt; 2 sec) noted at physical examination</b> | yes/no               |                                                              | Mandatory   |                                                                                                                                    |
| Infectious diseases | <b>Signs of dehydration noted at physical examination</b>                         | standardized options | No<br>Yes, < 5%<br>Yes, 5-10%<br>Yes, >10%                   | Mandatory   |                                                                                                                                    |
| Metabolic diseases  | <b>Skin abnormalities</b>                                                         | yes/no               |                                                              | Mandatory   | Presence of skin abnormalities                                                                                                     |
| Metabolic diseases  | <b>Abnormal body proportions</b>                                                  | yes/no               |                                                              | Recommended | Presence of abnormal body proportions                                                                                              |
| Nephrology          | <b>Average 24-hour arterial pressure, systolic</b>                                | number               |                                                              | Mandatory   | In mmHg                                                                                                                            |
| Nephrology          | <b>Average 24-hour arterial pressure, diastolic</b>                               | number               |                                                              | Mandatory   | In mmHg                                                                                                                            |
| Nephrology          | <b>Average daytime systolic BP</b>                                                | number               |                                                              | Mandatory   | In mmHg                                                                                                                            |
| Nephrology          | <b>Average daytime diastolic BP</b>                                               | number               |                                                              | Mandatory   | In mmHg                                                                                                                            |
| Nephrology          | <b>Average night-time systolic BP</b>                                             | number               |                                                              | Mandatory   | In mmHg                                                                                                                            |
| Nephrology          | <b>Average night-time diastolic BP</b>                                            | number               |                                                              | Mandatory   | In mmHg                                                                                                                            |
| Nephrology          | <b>Mean Arterial Pressure (MAP)</b>                                               | number               |                                                              | Mandatory   | Measured MAP in mmHg                                                                                                               |
| Nephrology          | <b>Blood pressure dipping pattern</b>                                             | number               |                                                              | Mandatory   | Difference between daytime mean systolic pressure and night-time mean systolic pressure expressed as a percentage of the day value |
| Neurology           | <b>Walking ability</b>                                                            | standardized options | Community ambulator<br>Household ambulator<br>Non-ambulatory | Mandatory   |                                                                                                                                    |
| Pulmonology         | <b>Auscultation</b>                                                               | normal/abnormal      |                                                              | Mandatory   |                                                                                                                                    |
| Pulmonology         | <b>Thorax shape</b>                                                               | normal/abnormal      |                                                              | Mandatory   | The shape of the thorax                                                                                                            |
| Rheumatology        | <b>Active arthritis</b>                                                           | yes/no               |                                                              | Mandatory   | Presence of active arthritis                                                                                                       |
| Rheumatology        | <b>If active arthritis: number of joints involved</b>                             | number               |                                                              | Mandatory   | Number of joints involved in active arthritis                                                                                      |
| Rheumatology        | <b>Maximal mouth opening</b>                                                      | number               |                                                              | Mandatory   | Maximal mouth opening in mm                                                                                                        |
| Rheumatology        | <b>Muscle strength</b>                                                            | normal/abnormal      |                                                              | Recommended | Overall muscle strength                                                                                                            |

### Appendix 3 : SwissPedData Common Data Model (CDM), Version 1.0

| Module(s)                       | Common Data Element                                            | Format               | Standardized response options                                                                        | Importance | Comment / Description                                                                                                                                                                                                                                                                                                                                                                                                        |
|---------------------------------|----------------------------------------------------------------|----------------------|------------------------------------------------------------------------------------------------------|------------|------------------------------------------------------------------------------------------------------------------------------------------------------------------------------------------------------------------------------------------------------------------------------------------------------------------------------------------------------------------------------------------------------------------------------|
| <b>Domain: Clinical scores</b>  |                                                                |                      |                                                                                                      |            |                                                                                                                                                                                                                                                                                                                                                                                                                              |
| General paediatrics             | <b>Triage scale (ED), type</b>                                 | standardized options | Australasian Triage Scale<br>Canadian Triage Scale<br>Other                                          | Mandatory  | Name of the triage scale used                                                                                                                                                                                                                                                                                                                                                                                                |
| General paediatrics             | <b>Triage scale (ED), value</b>                                | number               |                                                                                                      | Mandatory  | Value of the triage scale                                                                                                                                                                                                                                                                                                                                                                                                    |
| General paediatrics             | <b>AVPU score</b>                                              | standardized options | Alert<br>Voice<br>Pain<br>Unresponsive                                                               | Mandatory  |                                                                                                                                                                                                                                                                                                                                                                                                                              |
| General paediatrics             | <b>Glasgow Coma Scale</b>                                      | number               |                                                                                                      | Mandatory  |                                                                                                                                                                                                                                                                                                                                                                                                                              |
| Cardiology                      | <b>Modified Ross heart failure classification for children</b> | standardized options | Class I<br>Class II<br>Class III<br>Class IV                                                         | Mandatory  | Class I: Asymptomatic<br>Class II: Mild tachypnea or diaphoresis with feeding in infants, dyspnea on exertion in older children<br>Class III: Marked tachypnea or diaphoresis with feeding in infants, marked dyspnea on exertion, prolonged feeding times with growth failure<br>Class IV: Symptoms such as tachypnea, retractions, grunting or diaphoresis at rest                                                         |
| Cardiology                      | <b>NYHA classification for adults</b>                          | standardized options | Class I<br>Class II<br>Class III<br>Class IV                                                         | Mandatory  | Class I: No symptoms and no limitation in ordinary physical activity<br>Class II: Mild symptoms (mild shortness of breath and/or angina) and slight limitation during ordinary activity.<br>Class III: Marked limitation in activity due to symptoms, even during less-than-ordinary activity. Comfortable only at rest.<br>Class IV: Severe limitations. Experiences symptoms even while at rest. Mostly bedbound patients. |
| Endocrinology                   | <b>Endocrinology clinical score type</b>                       | standardized options | Crook score<br>Billewicz score<br>Ferriman-Gallway score<br>Prader stage<br>External genitalia score | Optional   | Type of score                                                                                                                                                                                                                                                                                                                                                                                                                |
| Endocrinology                   | <b>Endocrinology clinical score result</b>                     | number               | number                                                                                               | Optional   | Result of score                                                                                                                                                                                                                                                                                                                                                                                                              |
| Gastroenterology                | <b>PCDAI</b>                                                   | number               |                                                                                                      | Mandatory  | Paediatric Crohn's Disease Activity Index                                                                                                                                                                                                                                                                                                                                                                                    |
| Gastroenterology                | <b>PUCAI</b>                                                   | number               |                                                                                                      | Mandatory  | Paediatric Ulcerative Colitis Activity Index                                                                                                                                                                                                                                                                                                                                                                                 |
| Gastroenterology                | <b>PYMS score</b>                                              | number               |                                                                                                      | Mandatory  | Paediatric Yorkhill Malnutrition Score                                                                                                                                                                                                                                                                                                                                                                                       |
| Gastroenterology                | <b>Bristol stool scale</b>                                     | number               |                                                                                                      | Mandatory  |                                                                                                                                                                                                                                                                                                                                                                                                                              |
| Allergy/Immunology              | <b>SCORAD index</b>                                            | number               |                                                                                                      | Mandatory  | SCORing Atopic Dermatitis Index                                                                                                                                                                                                                                                                                                                                                                                              |
| Metabolic diseases<br>Neurology | <b>Developmental test: Type</b>                                | standardized options | Bayley II<br>Bayley III                                                                              | Mandatory  | Type of developmental test performed                                                                                                                                                                                                                                                                                                                                                                                         |

### Appendix 3 : SwissPedData Common Data Model (CDM), Version 1.0

| Module(s)                           | Common Data Element                                                     | Format               | Standardized response options                      | Importance  | Comment / Description                                                                                     |
|-------------------------------------|-------------------------------------------------------------------------|----------------------|----------------------------------------------------|-------------|-----------------------------------------------------------------------------------------------------------|
|                                     |                                                                         |                      | Griffith<br>Other                                  |             |                                                                                                           |
| Metabolic diseases<br>Neurology     | <b>Development test: Results</b>                                        | normal/abnormal      |                                                    | Mandatory   | Result of developmental test performed                                                                    |
| Metabolic diseases                  | <b>Developmental delay</b>                                              | yes/no               |                                                    | Mandatory   | Developmental delay as assessed by treating physician                                                     |
| Nephrology                          | <b>CKD stage</b>                                                        | number               |                                                    | Mandatory   | Chronic Kidney Disease stage                                                                              |
| Pulmonology                         | <b>Epworth Sleepiness Scale</b>                                         | number               |                                                    | Mandatory   |                                                                                                           |
| Pulmonology                         | <b>Lung-to-Head-Ratio</b>                                               | number               |                                                    | Mandatory   | Congenital diaphragmatic hernia                                                                           |
| Pulmonology                         | <b>PICADAR</b>                                                          | number               |                                                    | Mandatory   | Primary Ciliary Dyskinesia Rule                                                                           |
| <b>Domain: Investigations</b>       |                                                                         |                      |                                                    |             |                                                                                                           |
| General paediatrics                 | <b>Type of radiological study (detailed)</b>                            | standardized options | See comments                                       | Mandatory   | Standard classification to be defined                                                                     |
| General paediatrics                 | <b>Date and time of imaging study</b>                                   | datetime             | YYYY-MM-DD hh:mm:ss                                | Mandatory   | Date and time of the radiological study                                                                   |
| General paediatrics                 | <b>Radiation dose</b>                                                   | number               |                                                    | Mandatory   | If applicable, dose of radiation in mSv                                                                   |
| General paediatrics                 | <b>Indication for the imaging study</b>                                 | free text            |                                                    | Mandatory   | Medical reason for the radiological study                                                                 |
| Cardiology                          | <b>ECG performed</b>                                                    | yes/no               |                                                    | Mandatory   | Date of study should be recorded                                                                          |
| Cardiology                          | <b>Holter-ECG</b>                                                       | yes/no               |                                                    | Mandatory   | Date of study should be recorded                                                                          |
| Cardiology                          | <b>Ergometry</b>                                                        | yes/no               |                                                    | Mandatory   | Date of study should be recorded                                                                          |
| Cardiology                          | <b>Echocardiography performed</b>                                       | yes/no               |                                                    | Mandatory   | Detailed standardized echo measurements will be discussed in the future. Date of study should be recorded |
| Cardiology                          | <b>Cardiac electrophysiology study performed</b>                        | yes/no               |                                                    | Mandatory   | Date of study should be recorded                                                                          |
| Cardiology                          | <b>Diagnostic cardiac catheterization (hemodynamic study) performed</b> | yes/no               |                                                    | Mandatory   | Date of study should be recorded                                                                          |
| Endocrinology                       | <b>Bone age: method</b>                                                 | standardized options | Greulich & Pyle<br>BoneXpertR<br>Tanner Whitehouse | Mandatory   | Method used to assess radiographic bone age. Date of study should be recorded                             |
| Endocrinology                       | <b>Bone age: result</b>                                                 | number               |                                                    | Mandatory   | Bone age result in years                                                                                  |
| Endocrinology<br>Metabolic diseases | <b>Use of continuous glucose monitoring</b>                             | yes/no               |                                                    | Recommended | Use of glucose sensor                                                                                     |
| Endocrinology                       | <b>Number of days per week with continuous glucose monitoring</b>       | number               |                                                    | Mandatory   | Days per week                                                                                             |

### Appendix 3 : SwissPedData Common Data Model (CDM), Version 1.0

| Module(s)                         | Common Data Element                              | Format               | Standardized response options                                                                            | Importance | Comment / Description                                                                                                                  |
|-----------------------------------|--------------------------------------------------|----------------------|----------------------------------------------------------------------------------------------------------|------------|----------------------------------------------------------------------------------------------------------------------------------------|
| Endocrinology                     | <b>Continuous glucose monitoring: Device</b>     | standardized options | Freestyle libre<br>Freestyle libre 2<br>Dexcom G5<br>Dexcom G6<br>Medtronic Guardian<br>Medtronic Enlyte | Mandatory  |                                                                                                                                        |
| Endocrinology                     | <b>Blood glucose self-measurement</b>            | number               |                                                                                                          | Mandatory  | Number of measures per week                                                                                                            |
| Endocrinology                     | <b>Scans per day</b>                             | number               |                                                                                                          | Mandatory  | If Flash Glucose Monitoring (FGM) is used                                                                                              |
| Endocrinology                     | <b>Blood ketone measurement</b>                  | number               |                                                                                                          | Mandatory  | Number of measures per week                                                                                                            |
| Endocrinology                     | <b>Mean glucose</b>                              | number               |                                                                                                          | Mandatory  | mmol/l                                                                                                                                 |
| Endocrinology                     | <b>Glucose variability</b>                       | number               |                                                                                                          | Mandatory  | %                                                                                                                                      |
| Endocrinology                     | <b>Time in range</b>                             | number               |                                                                                                          | Mandatory  | Time between 4.0 and 10.0 mmol/l in %                                                                                                  |
| Endocrinology                     | <b>Time in hypoglycemia</b>                      | number               |                                                                                                          | Mandatory  | Time < 3.9mmol/l in %                                                                                                                  |
| Gastroenterology                  | <b>Type of gastrointestinal endoscopy</b>        | standardized options | Upper<br>Lower<br>Upper and lower<br>Other                                                               | Mandatory  | Date of study should be recorded                                                                                                       |
| Gastroenterology                  | <b>Indication for gastrointestinal endoscopy</b> | standardized options | Rectal bleeding<br>Abdominal pain<br>Dysphagia<br>Diarrhea<br>Other                                      | Mandatory  | Medical reason for the endoscopic study. Other include for example oesophageal atresia or other anatomical abnormality, food impaction |
| Gastroenterology                  | <b>Gastrointestinal endoscopic biopsy</b>        | yes/no               |                                                                                                          | Mandatory  | Gastrointestinal endoscopic biopsy performed. Date of study should be recorded                                                         |
| Gastroenterology                  | <b>Impedance-pHmetry</b>                         | yes/no               |                                                                                                          | Mandatory  | Date of study should be recorded                                                                                                       |
| Gastroenterology                  | <b>Type of breath test</b>                       | standardized options | Lactose<br>Lactulose<br>Fructose<br>Urea<br>Other                                                        | Mandatory  | Type of breath test. Date of study should be recorded                                                                                  |
| Gastroenterology                  | <b>Capsule endoscopy</b>                         | yes/no               |                                                                                                          | Mandatory  | Date of study should be recorded                                                                                                       |
| Gastroenterology                  | <b>Endoscopic ultrasound</b>                     | yes/no               |                                                                                                          | Mandatory  | Date of study should be recorded                                                                                                       |
| Gastroenterology                  | <b>Liver biopsy</b>                              | yes/no               |                                                                                                          | Mandatory  | Date of study should be recorded                                                                                                       |
| Allergy/Immunology                | <b>Prick-test performed</b>                      | yes/no               |                                                                                                          | Mandatory  | Date of study should be recorded                                                                                                       |
| Allergy/Immunology<br>Pulmonology | <b>slgE performed</b>                            | yes/no               |                                                                                                          | Mandatory  | slgE stands for specific serum immunoglobulin E. Date of study should be recorded                                                      |
| Allergy/Immunology                | <b>Result of slgE</b>                            | positive/negative    |                                                                                                          | Mandatory  | slgE stands for specific serum immunoglobulin E                                                                                        |

**Appendix 3 : SwissPedData Common Data Model (CDM), Version 1.0**

| Module(s)           | Common Data Element                                                        | Format               | Standardized response options                                                                                                                                                                                                                                                                                                                                                                                        | Importance | Comment / Description                                                            |
|---------------------|----------------------------------------------------------------------------|----------------------|----------------------------------------------------------------------------------------------------------------------------------------------------------------------------------------------------------------------------------------------------------------------------------------------------------------------------------------------------------------------------------------------------------------------|------------|----------------------------------------------------------------------------------|
| Allergy/Immunology  | <b>Result of prick-test</b>                                                | positive/negative    |                                                                                                                                                                                                                                                                                                                                                                                                                      | Mandatory  | Date of study should be recorded                                                 |
| Allergy/Immunology  | <b>Allergen challenge performed</b>                                        | yes/no               |                                                                                                                                                                                                                                                                                                                                                                                                                      | Mandatory  | Date of study should be recorded                                                 |
| Allergy/Immunology  | <b>Allergen challenge result</b>                                           | positive/negative    |                                                                                                                                                                                                                                                                                                                                                                                                                      | Mandatory  |                                                                                  |
| Infectious diseases | <b>Urine collection method</b>                                             | standardized options | Urethral catheterization<br>Clean catch void<br>Urine collection bag<br>Mid-stream urine<br>Suprapubic aspiration                                                                                                                                                                                                                                                                                                    | Mandatory  | Method of collection of urine for culture. Date of study should be recorded      |
| Infectious diseases | <b>Mantoux test</b>                                                        | number               |                                                                                                                                                                                                                                                                                                                                                                                                                      | Mandatory  | In mm. Date of study should be recorded                                          |
| Infectious diseases | <b>Mantoux test: interpretation</b>                                        | standardized options | Positive<br>Negative<br>Doubtful<br>Unknown                                                                                                                                                                                                                                                                                                                                                                          | Mandatory  | Healthcare provider's interpretation of Mantoux test                             |
| Infectious diseases | <b>IGRA result</b>                                                         | standardized options | Positive<br>Negative<br>Indeterminate                                                                                                                                                                                                                                                                                                                                                                                | Mandatory  | IGRA stands for Interferon-Gamma Release Assay. Date of study should be recorded |
| Nephrology          | <b>Renal ultrasound result</b>                                             | normal/abnormal      |                                                                                                                                                                                                                                                                                                                                                                                                                      | Mandatory  | Date of study should be recorded                                                 |
| Nephrology          | <b>Renal MRI result</b>                                                    | normal/abnormal      |                                                                                                                                                                                                                                                                                                                                                                                                                      | Mandatory  | Date of study should be recorded                                                 |
| Nephrology          | <b>Voiding cystourethrography or kidney microbubble ultrasound results</b> | standardized options | No vesicoureteral reflux<br>Vesicoureteral reflux, unilateral – Grade I<br>Vesicoureteral reflux, unilateral – Grade II<br>Vesicoureteral reflux, unilateral – Grade III<br>Vesicoureteral reflux, unilateral – Grade IV<br>Vesicoureteral reflux, bilateral – Grade I<br>Vesicoureteral reflux, bilateral – Grade II<br>Vesicoureteral reflux, bilateral – Grade III<br>Vesicoureteral reflux, bilateral – Grade IV | Mandatory  | Date of study should be recorded                                                 |
| Nephrology          | <b>Posterior urethral valves</b>                                           | yes/no               |                                                                                                                                                                                                                                                                                                                                                                                                                      |            |                                                                                  |
| Nephrology          | <b>Renal scintigraphy results</b>                                          | standardized options | Normal<br>Hypoplasia<br>Scars<br>Other                                                                                                                                                                                                                                                                                                                                                                               | Mandatory  | Date of study should be recorded                                                 |
| Nephrology          | <b>Estimated GFR by Schwartz formula</b>                                   | number               |                                                                                                                                                                                                                                                                                                                                                                                                                      | Mandatory  | GFR [ml/min]                                                                     |

### Appendix 3 : SwissPedData Common Data Model (CDM), Version 1.0

| Module(s)                              | Common Data Element                                                                     | Format               | Standardized response options                           | Importance               | Comment / Description                                                                                                                                                                     |
|----------------------------------------|-----------------------------------------------------------------------------------------|----------------------|---------------------------------------------------------|--------------------------|-------------------------------------------------------------------------------------------------------------------------------------------------------------------------------------------|
| Nephrology                             | <b>Proteinuria</b>                                                                      | number               |                                                         | Mandatory                | In mg/mmol (spot-urine) or mg/m2/h for 24h Urine                                                                                                                                          |
| Nephrology<br>Neurology<br>Pulmonology | <b>Genetic test performed</b>                                                           | yes/no               |                                                         | Mandatory<br>Recommended | Mandatory for nephrology, recommended for neurology and pulmonology                                                                                                                       |
| Neurology                              | <b>Neurologic electrophysiologic study: Type</b>                                        | standardized options | EEG<br>EMG<br>AEP<br>SEP<br>VEP<br>Other                | Mandatory                | EEG: electroencephalogram, EMG: electromyography, AEP: auditory evoked potentials, SEP: somatosensory evoked potentials, VEP: visual evoked potential<br>Date of study should be recorded |
| Neurology                              | <b>Neurologic electrophysiologic study: Result</b>                                      | normal/abnormal      |                                                         | Mandatory                |                                                                                                                                                                                           |
| Metabolic diseases<br>Neurology        | <b>Hearing test: Type</b>                                                               | standardized options | OAE<br>AEP<br>Pure tone audiometry                      | Mandatory                | OAE: otoacoustic emissions, AEP: auditory evoked potentials<br>Date of study should be recorded                                                                                           |
| Metabolic diseases<br>Neurology        | <b>Hearing test: Result</b>                                                             | normal/abnormal      |                                                         | Mandatory                |                                                                                                                                                                                           |
| Neurology                              | <b>Vision test: Performed by</b>                                                        | standardized options | Ophtalmologist<br>Optometrist<br>Peadiatrician<br>Other | Recommended              | Health professional who tested vision                                                                                                                                                     |
| Neurology                              | <b>Vision test: Result</b>                                                              | normal/abnormal      |                                                         | Recommended              |                                                                                                                                                                                           |
| Neurology                              | <b>Lumbar puncture performed</b>                                                        | yes/no               |                                                         | Mandatory                | Date of study should be recorded                                                                                                                                                          |
| Neurology                              | <b>Opening Pressure at Lumbar Puncture</b>                                              | number               |                                                         | Optional                 | Opening pressure in cmH2O                                                                                                                                                                 |
| Pulmonology                            | <b>Spirometry performed</b>                                                             | yes/no               |                                                         | Mandatory                | Date of study should be recorded                                                                                                                                                          |
| Pulmonology                            | <b>Lung function: RV</b>                                                                | number               |                                                         | Recommended              | RV: Residual volume. In L                                                                                                                                                                 |
| Pulmonology                            | <b>DLCO</b>                                                                             | number               | Diffusion capacity of the lung for carbon monoxide      | Recommended              | DLCO: diffusing capacity of the lungs for carbon monoxide. In ml CO/min/mmHg                                                                                                              |
| Pulmonology                            | <b>Lung function: Bronchodilator administered</b>                                       | yes/no               |                                                         | Mandatory                |                                                                                                                                                                                           |
| Pulmonology                            | <b>Bronchoscopy performed</b>                                                           | yes/no               |                                                         | Mandatory                | Date of study should be recorded                                                                                                                                                          |
| Pulmonology                            | <b>Lung function: Challenge test performed (treadmill, methacholine challenge test)</b> | yes/no               |                                                         | Mandatory                |                                                                                                                                                                                           |
| Pulmonology                            | <b>Broncho-alveolar lavage performed</b>                                                | yes/no               |                                                         | Mandatory                |                                                                                                                                                                                           |

### Appendix 3 : SwissPedData Common Data Model (CDM), Version 1.0

| Module(s)                | Common Data Element                                       | Format               | Standardized response options                                                | Importance  | Comment / Description                                                                                           |
|--------------------------|-----------------------------------------------------------|----------------------|------------------------------------------------------------------------------|-------------|-----------------------------------------------------------------------------------------------------------------|
| Pulmonology              | <b>Sweat test results</b>                                 | standardized options |                                                                              | Mandatory   | Chloride in mmol/l (Macroduct)<br>Conductivity in mmol/l eq NaCl (Nanoduct)<br>Date of study should be recorded |
| Pulmonology              | <b>Sleep studies</b>                                      | standardized options | Polysomnography<br>Respiratory Polygraphy<br>Oximetry                        | Mandatory   | Sleep studies performed<br>Date of study should be recorded                                                     |
| Pulmonology              | <b>Lung function: FEV1</b>                                | number               |                                                                              | Mandatory   | FEV1: forced expiratory volume-one second. pre/post<br>absolute number in L                                     |
| Pulmonology              | <b>Lung function: FVC</b>                                 | number               |                                                                              | Mandatory   | FVC: forced vital capacity. Pre/post. In L                                                                      |
| Pulmonology              | <b>Lung function: TLC</b>                                 | number               |                                                                              | Recommended | TLC: Total lung capacity. In L                                                                                  |
| Pulmonology              | <b>Lung function: LCI</b>                                 | number               |                                                                              | Recommended | LCI: Lung clearance index. Equipment / gas currently in use<br>in each center                                   |
| Pulmonology              | <b>Lung function: Nasal NO</b>                            | number               |                                                                              | Recommended | Nasal NO: Nasal nitric oxide measurement. in ppb or nl/mn                                                       |
| Pulmonology              | <b>Lung function: FeNO</b>                                | number               |                                                                              | Recommended | FeNO: exhaled nitric oxide test. Online or Off-line method.<br>absolute number in ppb                           |
| Pulmonology              | <b>Lung function: CPET performed</b>                      | yes/no               |                                                                              | Recommended | CPET: Cardiopulmonary Exercise Testing                                                                          |
| Pulmonology              | <b>Lung function: FEF 25-75</b>                           | number               |                                                                              | Recommended | FEF25-75: Forced expiratory flow over the middle one half of<br>the FVC (force vital capacity). in L/s          |
| Pulmonology              | <b>Lung function: FEV 0.75</b>                            | number               |                                                                              | Recommended | FEV 0.75: forced expiratory volume in 3/4 of a second.<br>pre/post. absolute number in L                        |
| Pulmonology              | <b>Lung function: sRaw</b>                                | number               |                                                                              | Recommended | sRaw: specific airway resistance. kPa/sec                                                                       |
| Pulmonology              | <b>Lung function: FRC</b>                                 | number               |                                                                              | Recommended | FRC: functional residual capacity. in L                                                                         |
| Pulmonology              | <b>Lung function: FRC: Test</b>                           | standardized options | Bodyplethysmography<br>MBW                                                   | Recommended | MBW: multiple breath washout                                                                                    |
| <b>Domain: Diagnosis</b> |                                                           |                      |                                                                              |             |                                                                                                                 |
| General paediatrics      | <b>Diagnosis</b>                                          | See comments         | See comments                                                                 | Mandatory   | Inpatients diagnosis are ICD10 coded and outpatients<br>diagnosis are free text.                                |
| General paediatrics      | <b>Date of diagnosis</b>                                  | date                 | YYYY-MM-DD                                                                   | Mandatory   |                                                                                                                 |
| General paediatrics      | <b>Cause of death</b>                                     | See comments         | See comments                                                                 | Mandatory   | Standard classification to be defined                                                                           |
| General paediatrics      | <b>Date of death</b>                                      | date                 | YYYY-MM-DD                                                                   | Mandatory   |                                                                                                                 |
| Cardiology               | <b>IPCCC diagnosis</b>                                    | standardized options | IPCCC Code                                                                   | Mandatory   | IPCCC: International Paediatric and Congenital Cardiac<br>Code                                                  |
| Allergy/Immunology       | <b>Allergic disease confirmation</b>                      | standardized options | Skin prick test<br>Allergen challenge<br>sIgE                                | Mandatory   |                                                                                                                 |
| Infectious diseases      | <b>If infectious diagnosis:<br/>Type of documentation</b> | standardized options | Clinically documented infection<br>Microbiologically documented<br>infection | Mandatory   |                                                                                                                 |



### Appendix 3 : SwissPedData Common Data Model (CDM), Version 1.0

| Module(s)                | Common Data Element                                   | Format               | Standardized response options                                                                                                                | Importance  | Comment / Description                           |
|--------------------------|-------------------------------------------------------|----------------------|----------------------------------------------------------------------------------------------------------------------------------------------|-------------|-------------------------------------------------|
| Infectious diseases      | <b>If infectious diagnosis: Nosocomial</b>            | yes/no               |                                                                                                                                              | Mandatory   |                                                 |
| Infectious diseases      | <b>If nosocomial infection: Date of first symptom</b> | date                 | YYYY-MM-DD                                                                                                                                   | Mandatory   |                                                 |
| Infectious diseases      | <b>If nosocomial infection: Site of infection</b>     | standardized options | Respiratory tract<br>Gastro-intestinal tract<br>Urinary tract<br>Surgical site<br>Other                                                      | Mandatory   |                                                 |
| Metabolic diseases       | <b>Diagnosis confirmation</b>                         | standardized options | Clinical<br>Biochemical<br>Enzymatic<br>Genetic                                                                                              | Mandatory   | The way diagnosis has been confirmed            |
| Metabolic diseases       | <b>Diagnosis suspicion</b>                            | standardized options | Prenatal<br>Newborn<br>Selective                                                                                                             | Mandatory   | The type of screening that led to the diagnosis |
| Neurology                | <b>OMIM code</b>                                      | standardized options | OMIM code                                                                                                                                    | Recommended | OMIM: Online Mendelian Inheritance in Man       |
| Neurology                | <b>HPO code</b>                                       | standardized options | HPO code                                                                                                                                     | Optional    | HPO: Human Phenotype Ontology                   |
| <b>Domain: Treatment</b> |                                                       |                      |                                                                                                                                              |             |                                                 |
| General paediatrics      | <b>Drug name</b>                                      | standardized options | International non-proprietary name                                                                                                           | Mandatory   | Name of the drug(s) received as inpatient       |
| General paediatrics      | <b>Prescribed drug at discharge</b>                   | standardized options | International non-proprietary name                                                                                                           | Mandatory   | Name of the drug(s) prescribed at discharge     |
| General paediatrics      | <b>Route of administration</b>                        | standardized options | Oral<br>Intravenous<br>Subcutaneous<br>Intramuscular<br>Intrathecal<br>Rectal<br>Inhalation<br>Cutaneous<br>Ocular<br>Nasal<br>Otic<br>Other | Mandatory   |                                                 |
| General paediatrics      | <b>Date and time of first administration</b>          | datetime             | YYYY-MM-DD hh:mm:ss                                                                                                                          | Mandatory   | Time of first administration of the drug        |
| General paediatrics      | <b>Date and time of last administration</b>           | datetime             | YYYY-MM-DD hh:mm:ss                                                                                                                          | Mandatory   | Time of last administration of the drug         |
| General paediatrics      | <b>Frequency of administration</b>                    | number               |                                                                                                                                              | Mandatory   | Number of administrations per 24 hours          |
| General paediatrics      | <b>Dose</b>                                           | number               |                                                                                                                                              | Mandatory   | Dose given at each administration of the drug   |

### Appendix 3 : SwissPedData Common Data Model (CDM), Version 1.0

| Module(s)                              | Common Data Element                                         | Format               | Standardized response options                                                                                                                   | Importance  | Comment / Description                                                        |
|----------------------------------------|-------------------------------------------------------------|----------------------|-------------------------------------------------------------------------------------------------------------------------------------------------|-------------|------------------------------------------------------------------------------|
| General paediatrics                    | <b>Dose unit</b>                                            | standardized options |                                                                                                                                                 | Mandatory   | List of possible units to be defined                                         |
| General paediatrics                    | <b>Reason for discontinuation of treatment</b>              | standardized options | Recovery<br>Change to another medication<br>No effect observable<br>Adverse events<br>Reducing polypharmacy<br>Other                            | Mandatory   | Reason why a treatment is stopped                                            |
| General paediatrics                    | <b>Adverse events</b>                                       | standardized options | MedDRA classification                                                                                                                           | Mandatory   | MedDRA: Medical Dictionary for Regulatory Activities                         |
| General paediatrics                    | <b>Supplemental O2: Date and time of start</b>              | datetime             | YYYY-MM-DD hh:mm:ss                                                                                                                             | Mandatory   | Time at starting oxygen therapy                                              |
| General paediatrics                    | <b>Supplemental O2: Date and time of interruption</b>       | datetime             | YYYY-MM-DD hh:mm:ss                                                                                                                             | Mandatory   | Time at stopping oxygen therapy                                              |
| General paediatrics                    | <b>Supportive services: Type</b>                            | standardized options | Physiotherapy<br>Ergotherapy<br>Social assistance<br>Other                                                                                      | Mandatory   |                                                                              |
| Endocrinology                          | <b>Type of insuline therapy</b>                             | standardized options | MDI<br>CSII                                                                                                                                     | Mandatory   | MDI: Multiple dose injection. CSII: Continuous subcutaneous insulin infusion |
| Endocrinology                          | <b>Total daily dose of insuline (long and short acting)</b> | number               |                                                                                                                                                 | Mandatory   | units per kg per day                                                         |
| Endocrinology                          | <b>Basal insuline</b>                                       | number               |                                                                                                                                                 | Mandatory   | Percentage of basal insuline (%)                                             |
| Gastroenterology<br>Metabolic diseases | <b>Therapeutic diet</b>                                     | yes/no               |                                                                                                                                                 | Mandatory   | Therapeutic diet prescribed by physician                                     |
| Metabolic diseases                     | <b>Type of therapeutic diet</b>                             | standardized options | Low-protein<br>Ketogenic<br>Low-fat<br>Frequent meals<br>Nocturnal feed<br>Medical food<br>Other                                                | Mandatory   | Type of therapeutic diet prescribed                                          |
| Allergy/Immunology                     | <b>Epinephrine Pen prescribed</b>                           | yes/no               |                                                                                                                                                 |             |                                                                              |
| Infectious diseases                    | <b>BCG immunization</b>                                     | standardized options | Yes<br>No<br>Unknown                                                                                                                            | Mandatory   |                                                                              |
| Neurology                              | <b>Rehabilitation supportive devices: Type</b>              | standardized options | Upper limb orthoses<br>Lower limb orthoses<br>Corset<br>Standing frame<br>Walking aid (crutches NF-walker, rollator etc.)<br>Wheelchair: Manual | Recommended |                                                                              |

### Appendix 3 : SwissPedData Common Data Model (CDM), Version 1.0

| Module(s)                               | Common Data Element                                       | Format               | Standardized response options                                                                                                                                         | Importance  | Comment / Description                                                                  |
|-----------------------------------------|-----------------------------------------------------------|----------------------|-----------------------------------------------------------------------------------------------------------------------------------------------------------------------|-------------|----------------------------------------------------------------------------------------|
|                                         |                                                           |                      | Wheelchair: Electric powered<br>Other                                                                                                                                 |             |                                                                                        |
| Pulmonology                             | <b>Pulmonary rehabilitation</b>                           | yes/no               |                                                                                                                                                                       | Recommended |                                                                                        |
| <b>Domain: Equipment and procedures</b> |                                                           |                      |                                                                                                                                                                       |             |                                                                                        |
| General paediatrics                     | <b>Equipment type</b>                                     | standardized options | See comments                                                                                                                                                          | Mandatory   | Standard classification to be defined                                                  |
| General paediatrics                     | <b>Equipment date of insertion</b>                        | date                 | YYYY-MM-DD                                                                                                                                                            | Mandatory   |                                                                                        |
| General paediatrics                     | <b>Equipment date of withdrawal</b>                       | date                 | YYYY-MM-DD                                                                                                                                                            | Mandatory   |                                                                                        |
| Cardiology                              | <b>Cardiac procedures</b>                                 | standardized options | IPCCC Code                                                                                                                                                            | Mandatory   | IPCCC: International Paediatric and Congenital Cardiac Code                            |
| Cardiology                              | <b>Date of cardiac procedure</b>                          | date                 | YYYY-MM-DD                                                                                                                                                            | Mandatory   | Date of intervention                                                                   |
| Gastroenterology                        | <b>Therapeutic gastrointestinal endoscopic procedures</b> | standardized options | Haemostasis<br>Oesophageal dilatation (Balloon/Savary)<br>Percutaneous endoscopic gastrostomy (PEG)<br>Endoscopic retrograde cholangiopancreatography (ERCP)<br>Other | Mandatory   |                                                                                        |
| Nephrology                              | <b>Type of dialysis (1)</b>                               | standardized options | Acute<br>Chronic                                                                                                                                                      | Mandatory   |                                                                                        |
| Nephrology                              | <b>Type of dialysis (2)</b>                               | standardized options | Haemodialysis<br>Peritoneal dialysis<br>Hemodiafiltration                                                                                                             | Mandatory   | If peritoneal dialysis, type of catheter and number of peritonitis should be specified |
| Nephrology                              | <b>Date of dialysis initiation</b>                        | datetime             | YYYY-MM-DD hh:mm:ss                                                                                                                                                   | Mandatory   |                                                                                        |
| Nephrology                              | <b>Date of dialysis termination</b>                       | datetime             | YYYY-MM-DD hh:mm:ss                                                                                                                                                   | Mandatory   |                                                                                        |
| Nephrology                              | <b>Dialysis: vascular access type</b>                     | standardized option  | Central venous catheter<br>Arteriovenous fistula<br>Arteriovenous graft                                                                                               | Mandatory   | If central venous catheter, its localization should be specified                       |
| Nephrology                              | <b>Renal transplantation, graft (1)</b>                   | standardized options | Deceased donor<br>Living donor                                                                                                                                        | Mandatory   |                                                                                        |
| Nephrology                              | <b>Renal transplantation, graft (2)</b>                   | standardized options | Related donor<br>Unrelated donor                                                                                                                                      | Mandatory   |                                                                                        |
| Nephrology                              | <b>Renal transplantation</b>                              | standardized options | Preemptive transplantation<br>Nonpreemptive transplantation                                                                                                           | Mandatory   |                                                                                        |
| Nephrology                              | <b>Renal transplantation: Number of received grafts</b>   | number               |                                                                                                                                                                       | Mandatory   | Number of grafts received including present one                                        |
| Nephrology                              | <b>Plasmapheresis performed</b>                           | yes/no               |                                                                                                                                                                       | Mandatory   |                                                                                        |

**Appendix 3 : SwissPedData Common Data Model (CDM), Version 1.0**

| Module(s)  | Common Data Element           | Format               | Standardized response options                                                                                  | Importance | Comment / Description |
|------------|-------------------------------|----------------------|----------------------------------------------------------------------------------------------------------------|------------|-----------------------|
| Nephrology | <b>Renal biopsy performed</b> | standardized options | No<br>Yes, without complication in the following 24 hours<br>Yes, with complications in the following 24 hours | Mandatory  |                       |
| Nephrology | <b>Cystoscopy performed</b>   | yes/no               |                                                                                                                | Mandatory  |                       |
| Nephrology | <b>Angiography performed</b>  | yes/no               |                                                                                                                | Mandatory  |                       |
